# Supplementary material
Source: publisher figshare collection journal article supplement (https://sage.figshare.com/ndownloader/files/14150444)
Supplement: Supplementary file 1 [file 14150444]

**Supplementary File for “Cuing both positive and negative episodic foresight reduces delay discounting but does not affect risk taking”**

**Additional exploratory (non-pre-registered) analyses**

There was no overall significant relationship between scores on the Kirby intertemporal choice questionnaire and scores on the BART, r = 0.11, p = 0.054 (Supplementary figure 1, top). There was also no relationship between scores on the Barratt impulsiveness scale-Brief and the Kirby monetary choice task (Supplementary figure 1, bottom). This lack of a relationship between self-reported impulsivity and intertemporal choice has been reported before (McLeish & Oxoby, 2007), however in this case the relationship is confounded by the fact that the Kirby scores were affected by the foresight manipulation while the self-report BIS-Brief should not have been.

**Supplementary Figure 1.** Top: Relationship between the proportion of larger, later rewards chosen in the Kirby and BART adjusted pump scores, collapsing across experimental conditions, r = 0.11, p = 0.054 (ns). Bottom: Relationship between the proportion of larger, later rewards chosen in the Kirby and BIS impulsivity scores, r = -.07, p = 0.214 (ns).
